# Supplementary material for: New metabolic signature for Chagas disease reveals sex steroid perturbation in humans and mice
Source: PubMed Central journal article supplement — Heliyon. 2022 Dec 15;8(12):e12380. doi: 10.1016/j.heliyon.2022.e12380 (PMC9800200; doi:10.1016/j.heliyon.2022.e12380), 2022-12-15

## Supplemental Materials

# New metabolic signature for Chagas disease reveals sex steroid perturbation in mice and humans

Makan Golizeh,<sup>1,2</sup> John Nam,<sup>2,3</sup> Eric Chatelain,<sup>4</sup> Yves Jackson,<sup>5</sup> Leanne B. Ohlund,<sup>6,7</sup>  
Asieh Rasoolizadeh,<sup>2</sup> Fabio Vasquez Camargo,<sup>2</sup> Louiza Mahrouche,<sup>8</sup> Alexandra Furtos,<sup>8</sup> Lekha Sleno,<sup>6,7\*</sup> Momar Ndao<sup>2,3,9,10\*</sup>

---

<sup>1</sup> Department of Mathematical and Physical Sciences, Concordia University of Edmonton, Edmonton, Alberta, Canada.

<sup>2</sup> National Reference Centre for Parasitology, Research Institute of McGill University Health Centre, Montreal, Quebec, Canada.

<sup>3</sup> Infectious Diseases and Immunity in Global Health (IDIGH) Program, Research Institute of McGill University Health Centre, Montreal, Quebec, Canada.

<sup>4</sup> Drugs for Neglected Diseases *initiative*, Geneva, Switzerland.

<sup>5</sup> Division of Primary Care Medicine, Geneva University Hospitals and University of Geneva, Geneva, Switzerland.

<sup>6</sup> Chemistry Department, Université du Québec à Montréal, Montreal, Quebec, Canada.

<sup>7</sup> Center for Excellence in Research on Orphan Diseases – Fondation Courtois (CERMO-FC), Montreal, Quebec, Canada.

<sup>8</sup> Chemistry Department, Regional Centre for Mass Spectrometry, Université de Montréal, Montreal, Quebec, Canada.

<sup>9</sup> Department of Experimental Medicine, McGill University, Montreal, Quebec, Canada.

<sup>10</sup> Department of Microbiology and Immunology, McGill University, Montreal, Quebec, Canada.

\* Corresponding authors: Momar Ndao, National Reference Center for Parasitology, Research Institute of the McGill University Health Center, Montreal, Quebec, Canada H4A 3J1; [momar.ndao@mcgill.ca](mailto:momar.ndao@mcgill.ca). Lekha Sleno, Chemistry Department, Université du Québec à Montréal, Montreal, Quebec, Canada; [sleno.lekha@uqam.ca](mailto:sleno.lekha@uqam.ca).

**Table S1. Tentative metabolites significantly ( $p < 0.01$ ) differentially expressed (fold-change  $\geq \pm 1.5$ ) in CD patients as compared to CD-negative controls (sorted by fold-change)**

| #  | $m/z$ (ppm) <sup>1</sup> | RT <sup>2</sup> (min) | Fold-change <sup>3</sup> | p-value               | Ion | Ionization mode | Tentative metabolite <sup>4</sup>                                                                                                                          |
|----|--------------------------|-----------------------|--------------------------|-----------------------|-----|-----------------|------------------------------------------------------------------------------------------------------------------------------------------------------------|
| 1  | 210.0760 (0)             | 9.5                   | 4.0                      | $1.9 \times 10^{-8}$  | M+H | Positive        | Hydroxyphenylacetyl glycine                                                                                                                                |
| 2  | 333.0593 (0)             | 10.4                  | 3.6                      | $6.5 \times 10^{-11}$ | M-H | Negative        | Glycerophosphoinositol                                                                                                                                     |
| 3  | 429.2053 (1)             | 16.3                  | 3.4                      | $4.7 \times 10^{-8}$  | M-H | Negative        | LysoPA(18:4/0:0)                                                                                                                                           |
| 4  | 344.1335 (1)             | 4.1                   | 3.4                      | $2.1 \times 10^{-8}$  | M+H | Positive        | N-(1-Deoxy-1-fructosyl)tyrosine                                                                                                                            |
| 5  | 301.1508 (3)             | 4.5                   | 2.7                      | $1.1 \times 10^{-3}$  | M-H | Negative        | Neuromedin B (1-3)                                                                                                                                         |
| 6  | 197.0810 (5)             | 14.2                  | 2.5                      | $1.0 \times 10^{-9}$  | M-H | Negative        | Methylene suberic acid (C10)                                                                                                                               |
| 7  | 333.2412 (4)             | 17.8                  | 2.5                      | $2.6 \times 10^{-10}$ | M+H | Positive        | Hydroxypregnenolone or dihydroxypregnenone or dihydrodeoxycorticosterone                                                                                   |
| 8  | 267.1339 (0)             | 4.2                   | 1.9                      | $5.9 \times 10^{-3}$  | M+H | Positive        | Phenylalanyl-threonine (X)                                                                                                                                 |
| 9  | 449.1282 (2)             | 3.3                   | 1.7                      | $7.9 \times 10^{-9}$  | M+H | Positive        | 4-Hydroxy-5-(trihydroxyphenyl)-valeric acid-O-methyl-O-glucuronide                                                                                         |
| 10 | 305.2122 (4)             | 18.0                  | 1.5                      | $1.9 \times 10^{-7}$  | M+H | Positive        | Hydroxytestosterone or oxoandrostenediol or dihydroxyandrostenedione or hydroxydehydroisoandrosterone or hydroxydehydroepiandrosterone or ketoetiocolanone |
| 11 | 126.0220 (3)             | 3.1                   | -1.5                     | $3.3 \times 10^{-4}$  | M+H | Positive        | Taurine (X)                                                                                                                                                |
| 12 | 211.0985 (4)             | 15.1                  | -2.0                     | $4.9 \times 10^{-6}$  | M-H | Negative        | Methylene azelaic acid (C11)                                                                                                                               |
| 13 | 187.0716 (1)             | 2.8                   | -2.0                     | $1.1 \times 10^{-3}$  | M+H | Positive        | Pyroglutamyl-glycine (X)                                                                                                                                   |
| 14 | 147.0769 (3)             | 3.0                   | -2.1                     | $2.2 \times 10^{-5}$  | M+H | Positive        | Glutamine (X)                                                                                                                                              |
| 15 | 730.4656 (1)             | 17.0                  | -2.1                     | $1.3 \times 10^{-5}$  | M-H | Negative        | PS(18:1/14:1)                                                                                                                                              |
| 16 | 804.5775 (2)             | 16.7                  | -2.2                     | $8.2 \times 10^{-3}$  | M-H | Negative        | PS(15:0/22:0)                                                                                                                                              |
| 17 | 311.2243 (5)             | 16.6                  | -2.2                     | $1.3 \times 10^{-6}$  | M-H | Negative        | Hydroperoxylinoleic acid (C18)                                                                                                                             |
| 18 | 215.1656 (2)             | 16.1                  | -2.2                     | $8.0 \times 10^{-5}$  | M-H | Negative        | Hydroxylauric acid (C12)                                                                                                                                   |
| 19 | 249.1125 (3)             | 16.3                  | -2.4                     | $1.7 \times 10^{-6}$  | M-H | Negative        | Ubiquinone-1                                                                                                                                               |
| 20 | 289.1047 (2)             | 17.5                  | -2.4                     | $5.4 \times 10^{-3}$  | M-H | Negative        | N-Succinyl-diaminopimelate                                                                                                                                 |
| 21 | 465.2468 (2)             | 3.1                   | -2.4                     | $6.5 \times 10^{-3}$  | M+H | Positive        | Asn-Gly-Phe-Lys (X)                                                                                                                                        |
| 22 | 800.5422 (3)             | 16.3                  | -2.4                     | $1.1 \times 10^{-5}$  | M-H | Negative        | PS(15:0/22:2)                                                                                                                                              |
| 23 | 361.1621 (2)             | 16.8                  | -2.5                     | $4.1 \times 10^{-5}$  | M-H | Negative        | Thyrotropin releasing hormone                                                                                                                              |

**Table S1. Tentative metabolites significantly differentially expressed in CD patients, continued**

| #  | <i>m/z</i> <sup>1</sup> | RT <sup>2</sup><br>(min) | Fold-change <sup>3</sup> | p-value                | Ion | Ionization mode | Tentative metabolite <sup>4</sup>                  |
|----|-------------------------|--------------------------|--------------------------|------------------------|-----|-----------------|----------------------------------------------------|
| 24 | 143.1081 (2)            | 16.4                     | -2.5                     | 4.4 × 10 <sup>-4</sup> | M-H | Negative        | Caprylic acid (C8)                                 |
| 25 | 570.3566 (0)            | 16.5                     | -2.6                     | 5.4 × 10 <sup>-6</sup> | M-H | Negative        | LysoPC(22:4)                                       |
| 26 | 678.4321 (5)            | 17.2                     | -2.6                     | 1.8 × 10 <sup>-6</sup> | M-H | Negative        | PS(14:0/14:0)                                      |
| 27 | 969.7004 (3)            | 17.4                     | -2.6                     | 7.2 × 10 <sup>-3</sup> | M-H | Negative        | TG(20:5/22:6/20:5)                                 |
| 28 | 422.2292 (5)            | 17.1                     | -2.8                     | 7.9 × 10 <sup>-5</sup> | M-H | Negative        | LysoPE(14:1/0:0)                                   |
| 29 | 187.1330 (5)            | 16.4                     | -3.0                     | 1.4 × 10 <sup>-4</sup> | M-H | Negative        | Hydroxycapric acid (C10)                           |
| 30 | 704.4500 (1)            | 17.0                     | -3.0                     | 2.3 × 10 <sup>-4</sup> | M-H | Negative        | PS(14:0/16:1)                                      |
| 31 | 157.0873 (2)            | 17.6                     | -3.1                     | 5.0 × 10 <sup>-3</sup> | M-H | Negative        | Oxocaprylic acid (C8)                              |
| 32 | 155.1071 (4)            | 17.2                     | -3.1                     | 8.5 × 10 <sup>-4</sup> | M-H | Negative        | Nonanedione (C9)                                   |
| 33 | 195.1023 (2)            | 16.7                     | -3.3                     | 4.9 × 10 <sup>-6</sup> | M-H | Negative        | 4-(3-hydroxybutyl)-2-methoxyphenol                 |
| 34 | 221.1185 (1)            | 17.1                     | -3.5                     | 2.0 × 10 <sup>-4</sup> | M-H | Negative        | 2-hydroxy-1-(4-methoxyphenyl)-4-methylpentan-3-one |
| 35 | 223.1339 (0)            | 16.4                     | -3.7                     | 3.6 × 10 <sup>-7</sup> | M-H | Negative        | 3-Methyl-5-pentyl-2-furanpropanoic acid            |
| 36 | 776.5440 (1)            | 17.3                     | -3.7                     | 2.1 × 10 <sup>-5</sup> | M-H | Negative        | PS(15:0/20:0)                                      |
| 37 | 732.4824 (0)            | 17.0                     | -4.4                     | 5.6 × 10 <sup>-4</sup> | M-H | Negative        | PS(18:1/14:0)                                      |
| 38 | 367.0181 (1)            | 17.4                     | -4.4                     | 1.7 × 10 <sup>-3</sup> | M-H | Negative        | Orotidylic acid                                    |
| 39 | 718.4651 (2)            | 16.6                     | -4.5                     | 7.4 × 10 <sup>-8</sup> | M-H | Negative        | PS(16:1/15:0)                                      |
| 40 | 829.5770 (2)            | 17.3                     | -4.8                     | 7.1 × 10 <sup>-5</sup> | M-H | Negative        | PA(24:1/22:6)                                      |
| 41 | 165.0914 (4)            | 16.6                     | -5.0                     | 2.1 × 10 <sup>-5</sup> | M-H | Negative        | 3-(4-methoxyphenyl)propan-1-ol                     |
| 42 | 802.5582 (3)            | 17.0                     | -6.7                     | 2.1 × 10 <sup>-4</sup> | M-H | Negative        | PS(15:0/22:1)                                      |

<sup>1</sup> All listed ions are singly charged (number in parenthesis is mass accuracy in parts per million). <sup>2</sup> LC retention time. <sup>3</sup> Fold-change LC-MS signal intensity (CD/control). <sup>4</sup> PA: phosphatidic acid; PC: phosphorylcholine; PE: phosphatidylethanolamine; PG: phosphatidylglycerol; PI: phosphatidylinositol; PS: phosphatidylserine; TG: triglyceride. Metabolites marked with **X** were confirmed by LC-MS/MS.

**Table S2. Pearson’s correlation coefficients (*r*) between CD metabolite biomarkers, sex, age, cardiomyopathy and treatment duration.** Taurine and Asn-Gly-Phe-Lys showed moderate correlation ( $0.4 < r < 0.8$ ) with patient’s sex. All other correlations were weak.

| Tentative Metabolite   | Sex     |           |         | Age     |           |         | Cardiomyopathy |           | Treatment Duration |
|------------------------|---------|-----------|---------|---------|-----------|---------|----------------|-----------|--------------------|
|                        | Disease | Follow-up | Control | Disease | Follow-up | Control | Disease        | Follow-up |                    |
| Glutamine              | 0.178   | 0.226     | 0.181   | -0.232  | 0.123     | -0.075  | 0.022          | -0.007    | -0.107             |
| Pyroglutamyl-glycine   | -0.179  | 0.121     | -0.187  | -0.126  | 0.310     | 0.369   | -0.083         | -0.110    | 0.063              |
| Phenylalanyl-threonine | 0.124   | -0.098    | -0.095  | -0.023  | 0.156     | -0.119  | 0.170          | 0.238     | -0.099             |
| Taurine                | -0.112  | 0.426     | -0.117  | 0.022   | 0.055     | -0.045  | 0.027          | 0.041     | -0.112             |
| Asn-Gly-Phe-Lys        | -0.501  | -0.298    | 0.088   | -0.275  | 0.007     | 0.070   | -0.212         | 0.189     | 0.098              |

**Figure S1. Scoring plots from interactive principal component analysis of the identified Chagas disease biomarkers in humans and metadata confounders: age (a), country of origin (b), diagnosis (c), sex (d).**

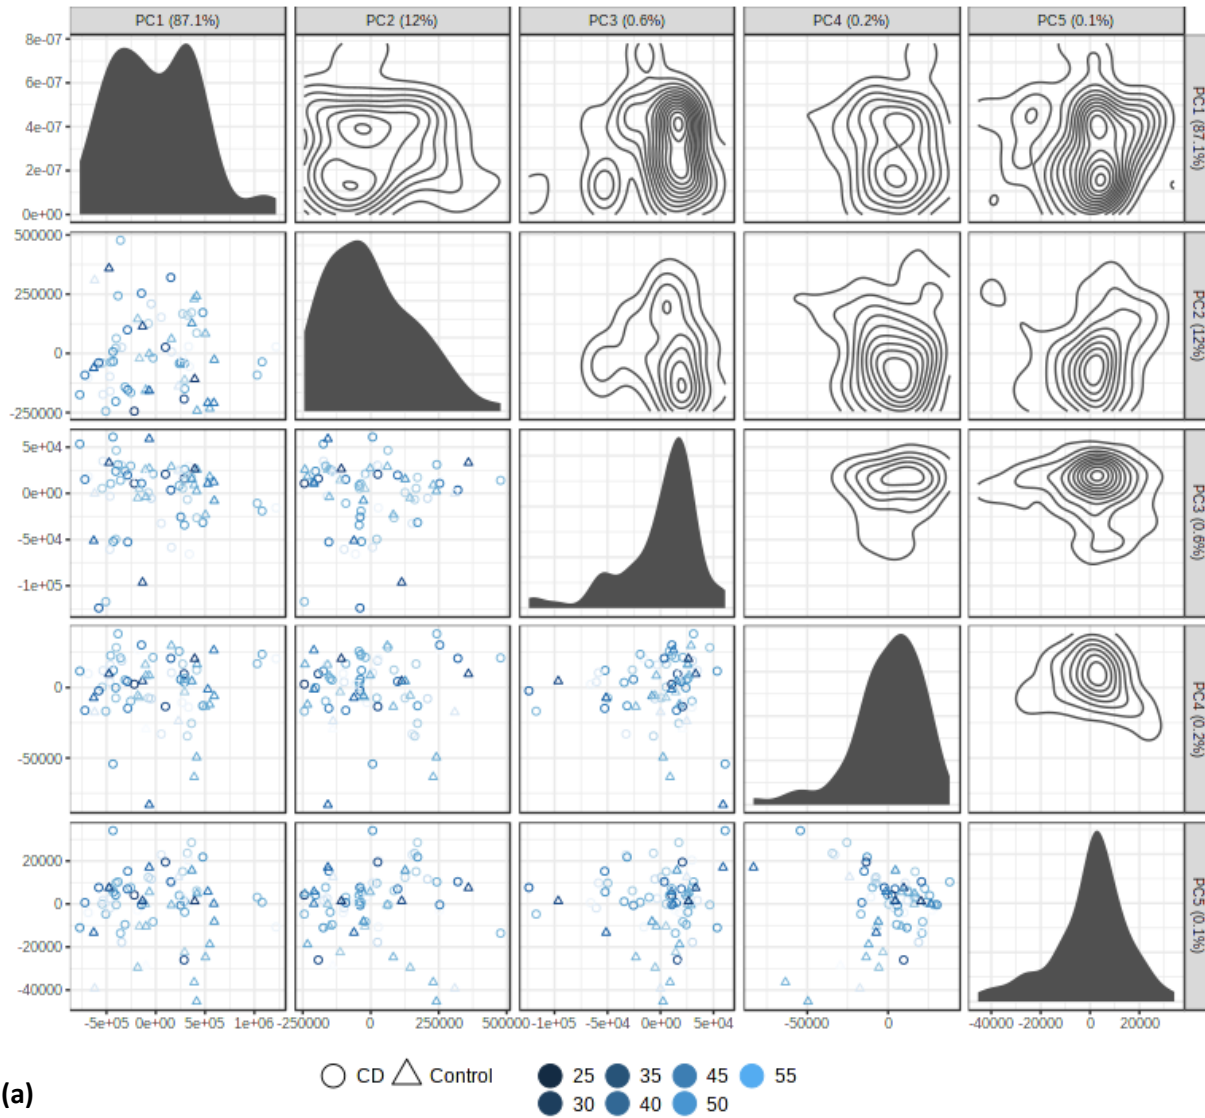

**Figure S1 (cont'd). Scoring plots from interactive principal component analysis of the identified Chagas disease biomarkers in humans and metadata confounders: age (a), country of origin (b), diagnosis (c), sex (d).**

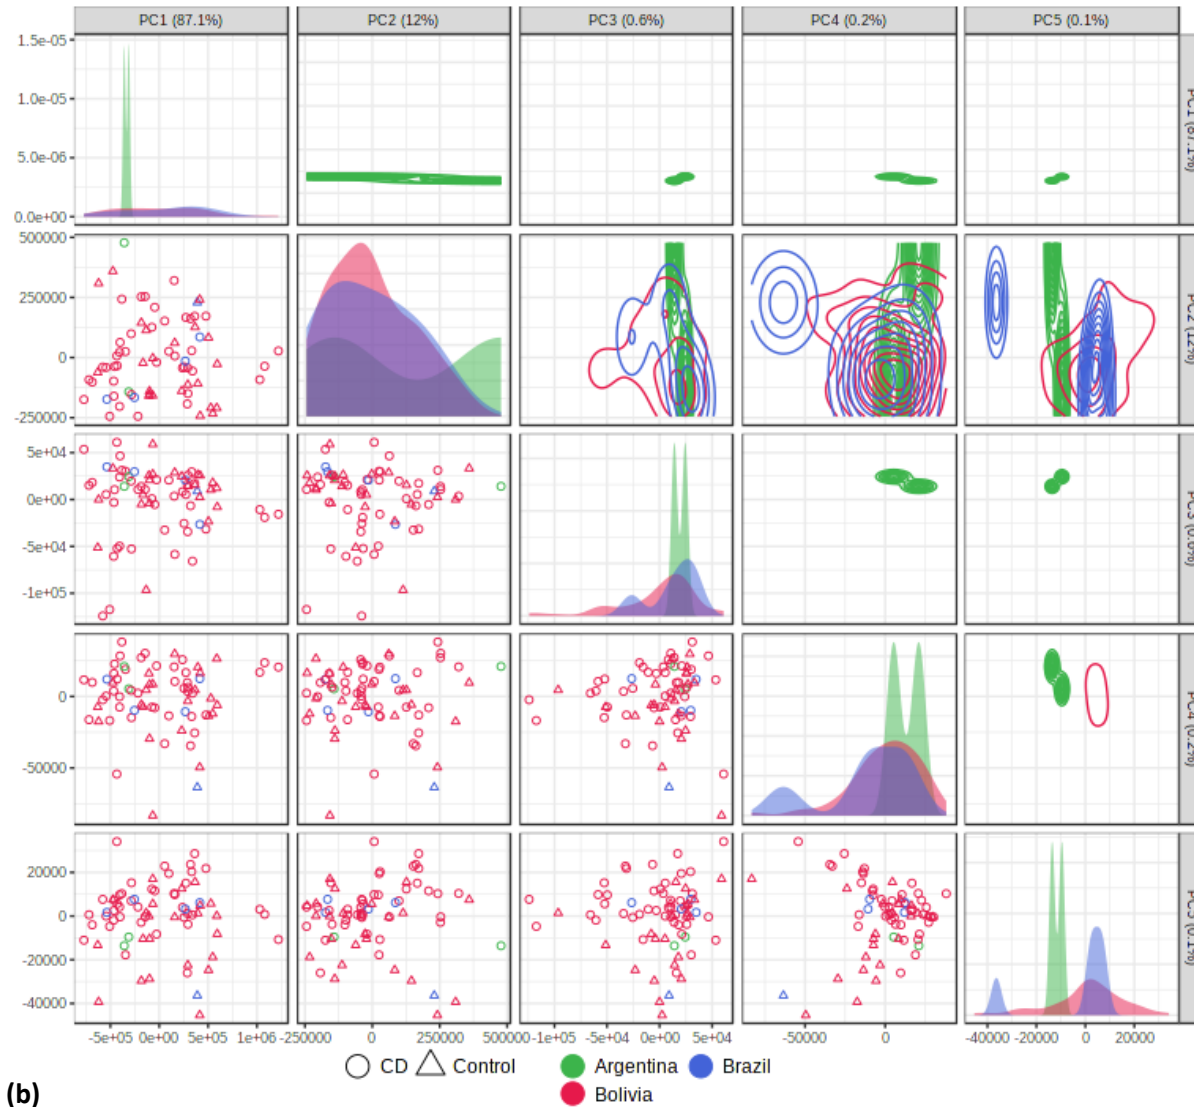

(b)

**Figure S1 (cont'd). Scoring plots from interactive principal component analysis of the identified Chagas disease biomarkers in humans and metadata confounders: age (a), country of origin (b), diagnosis (c), sex (d).**

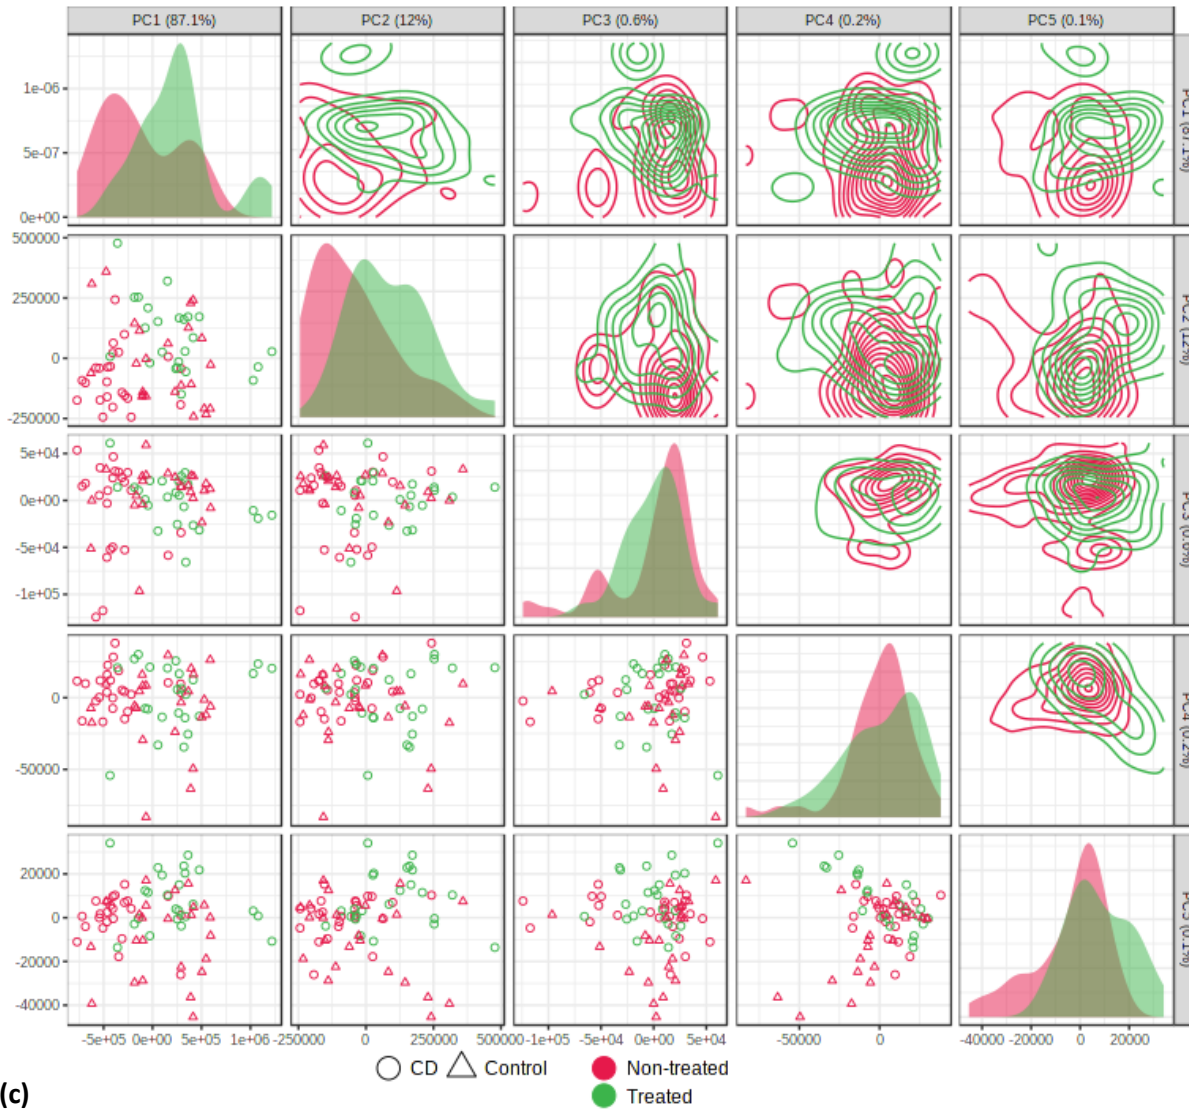

**Figure S1 (cont'd). Scoring plots from interactive principal component analysis of the identified Chagas disease biomarkers in humans and metadata confounders: age (a), country of origin (b), diagnosis (c), sex (d).**

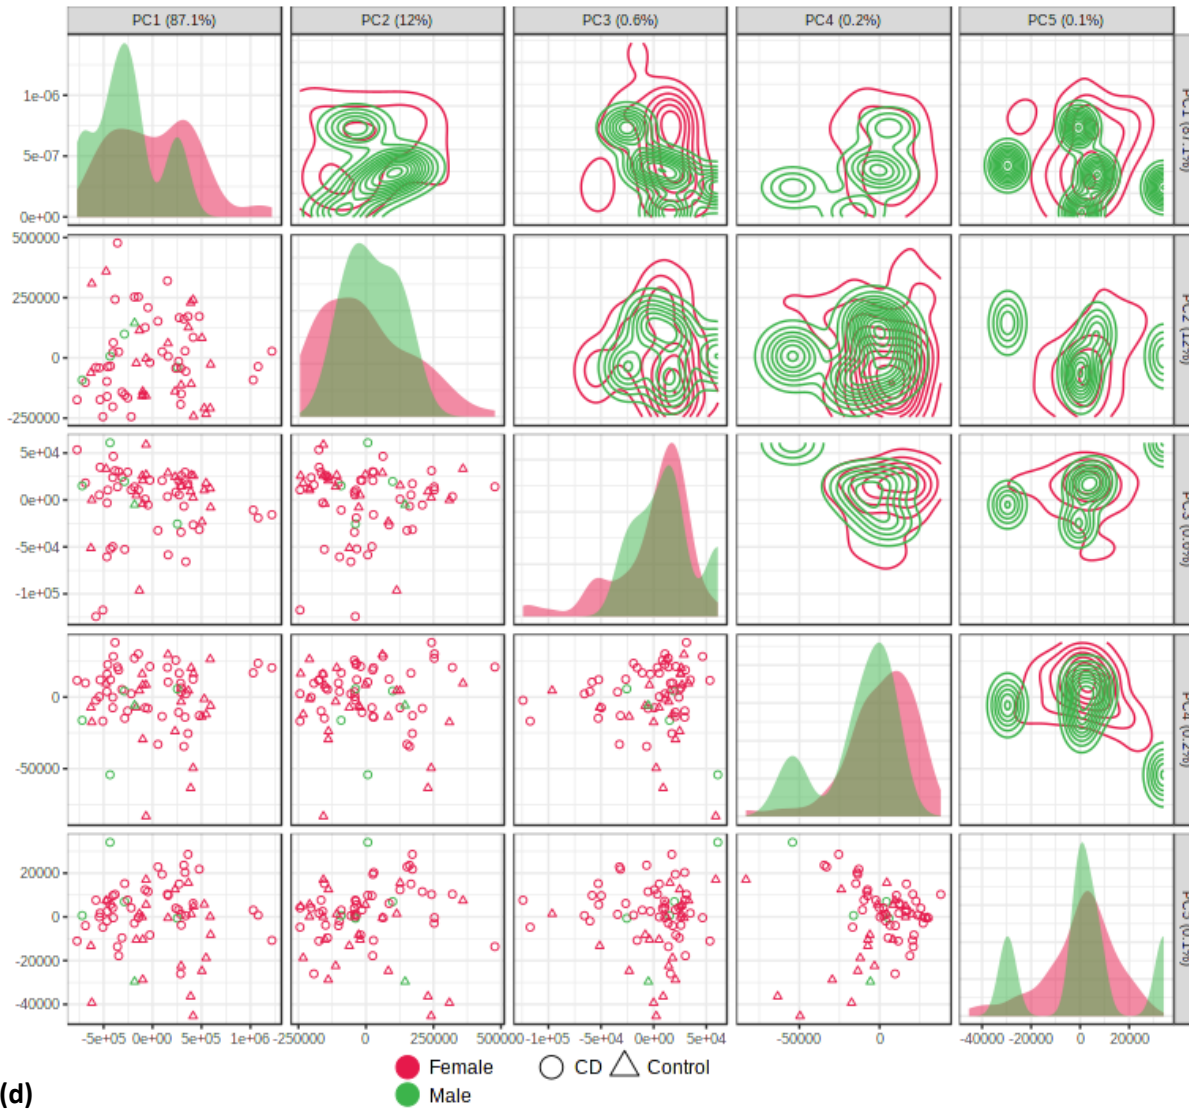



Figure S2. LC-MS/MS confirmation of Chagas disease biomarkers in human

PyroGlu-Gly MS and MS/MS

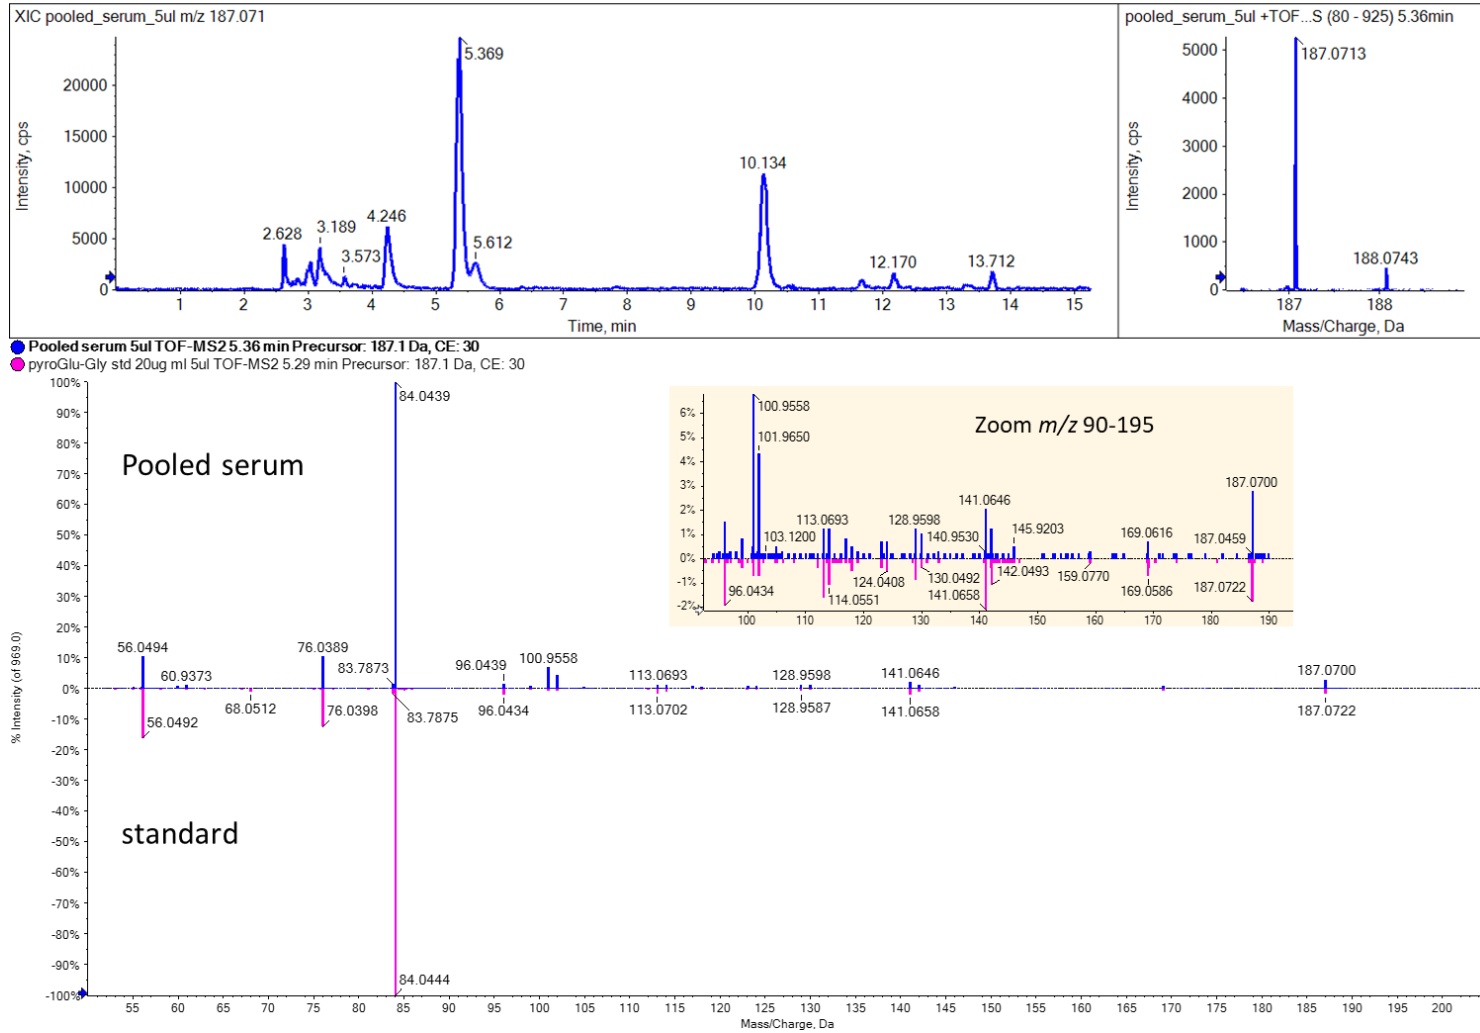

# Asn-Gly-Phe-Lys MS and MS/MS

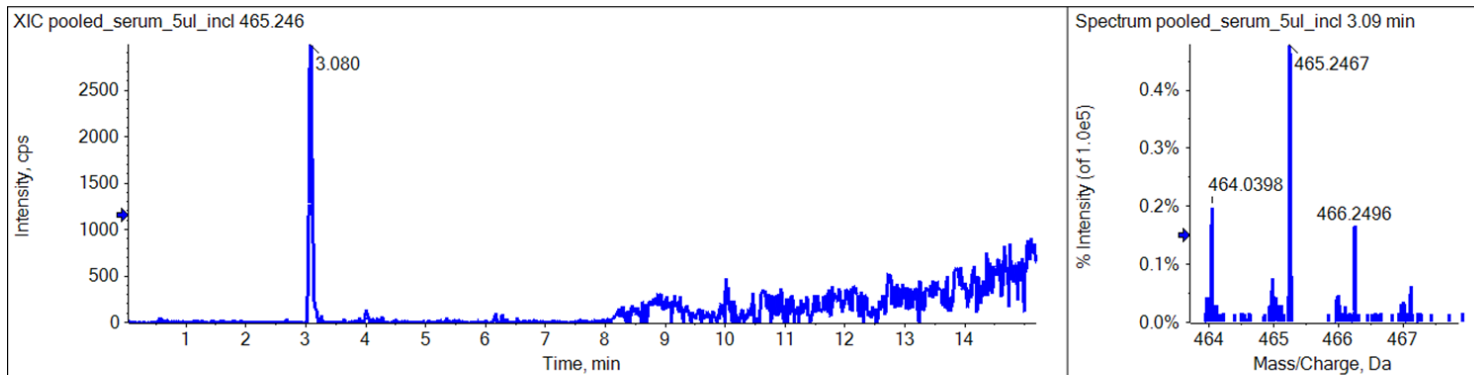

● pooled\_serum\_5ul\_inc 3.1 min 465.2 Da, CE: 30  
 ● peptide\_std\_mix\_50ug\_ml\_5ul\_incl 3.09 min 465.2 Da, CE: 30

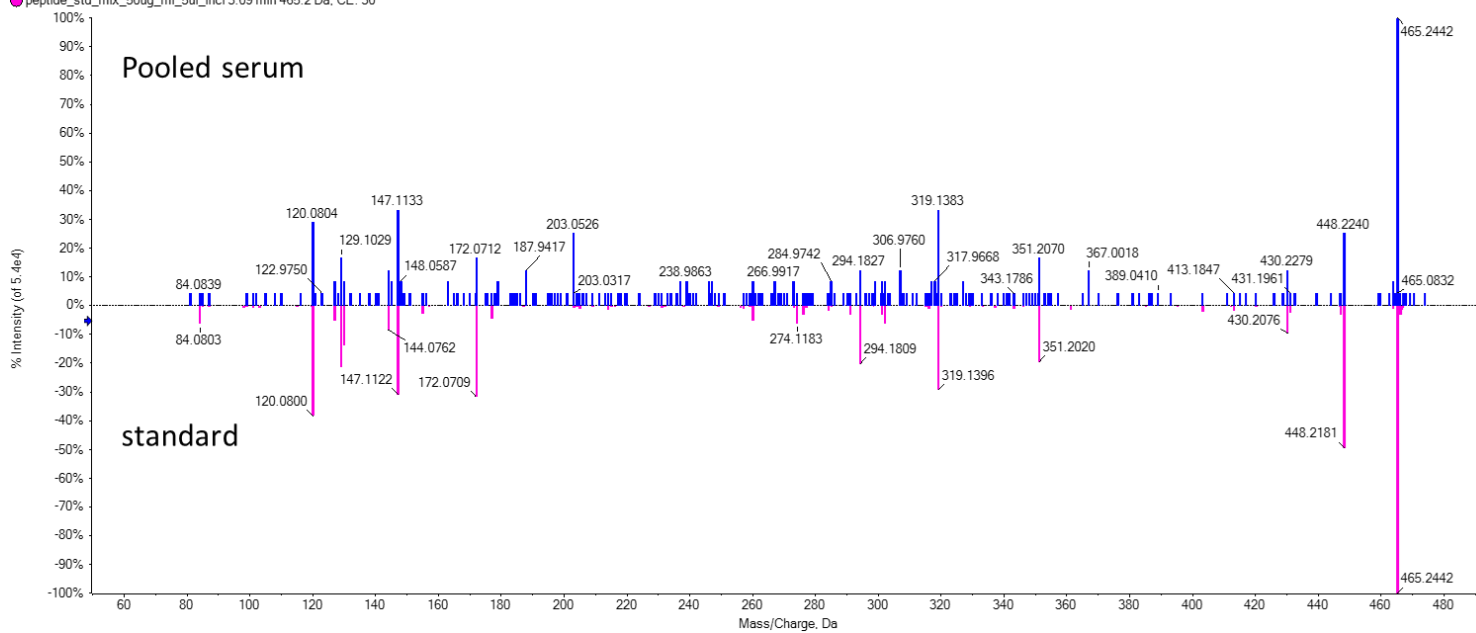

# Phe-Thr MS and MS/MS

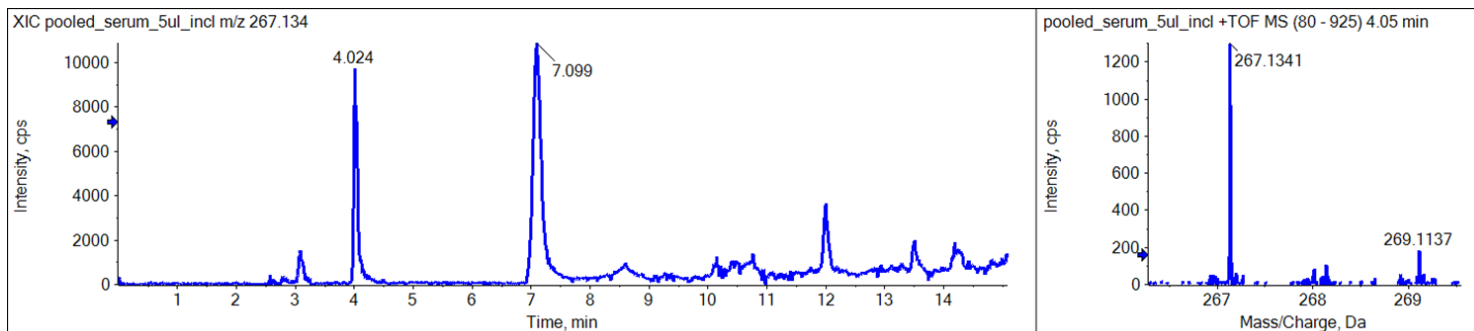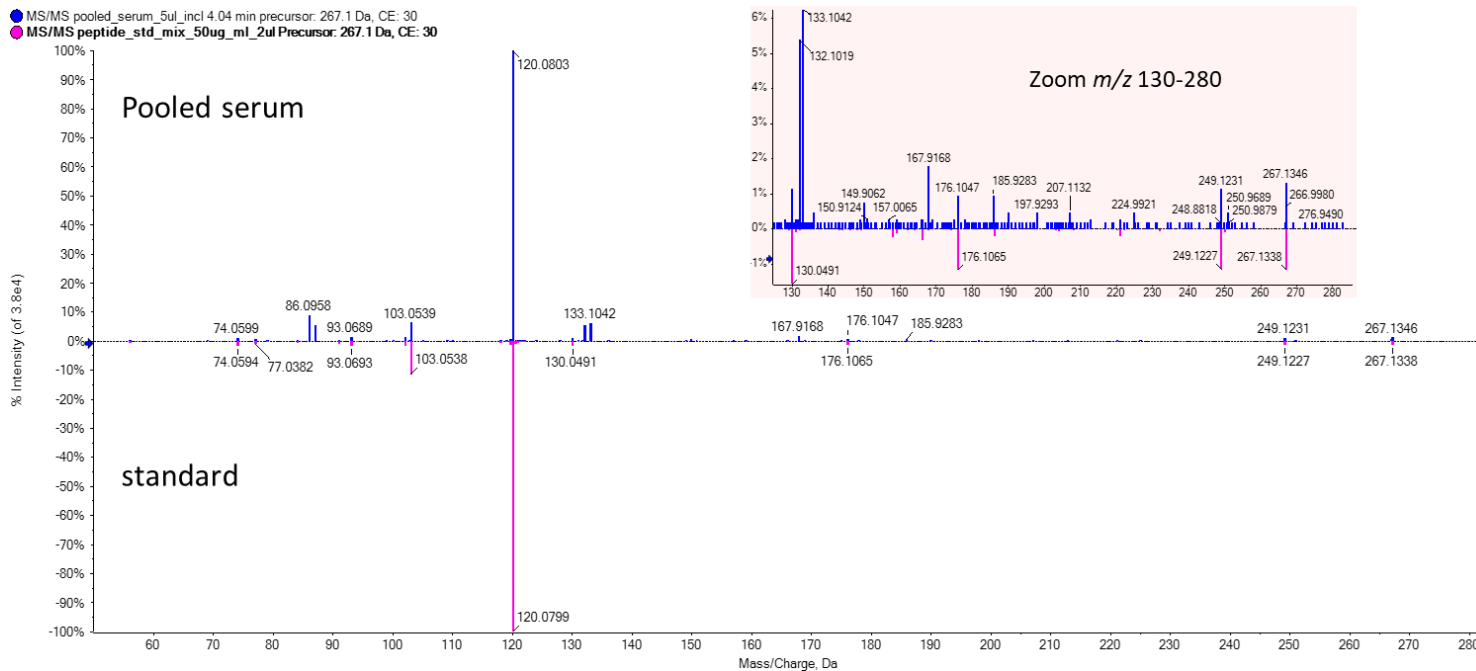

## XIC of 3 peptides in 3 serum-spiked samples

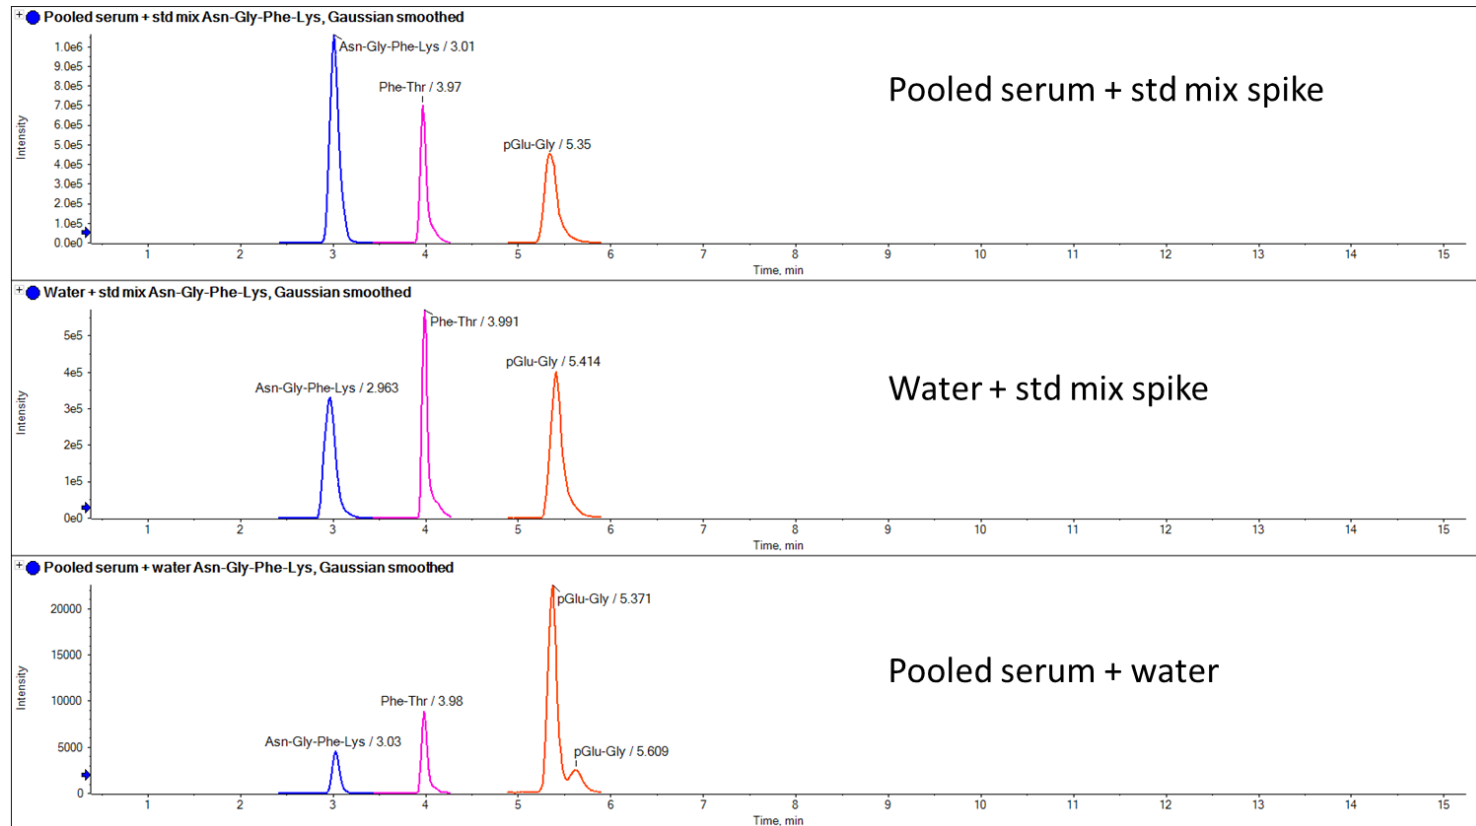

### Conclusions:

- Retention times of standards spiked in serum and water ctl are same
- Retention time of endogenous metabolites in pooled serum same as spiked serum
- Intensity highest for spiked serum, then water spiked, then endogenous serum

Glutamine: 14.0769 m/z, 3.1 min, fold-change = -2.1, p = 2.2e-5

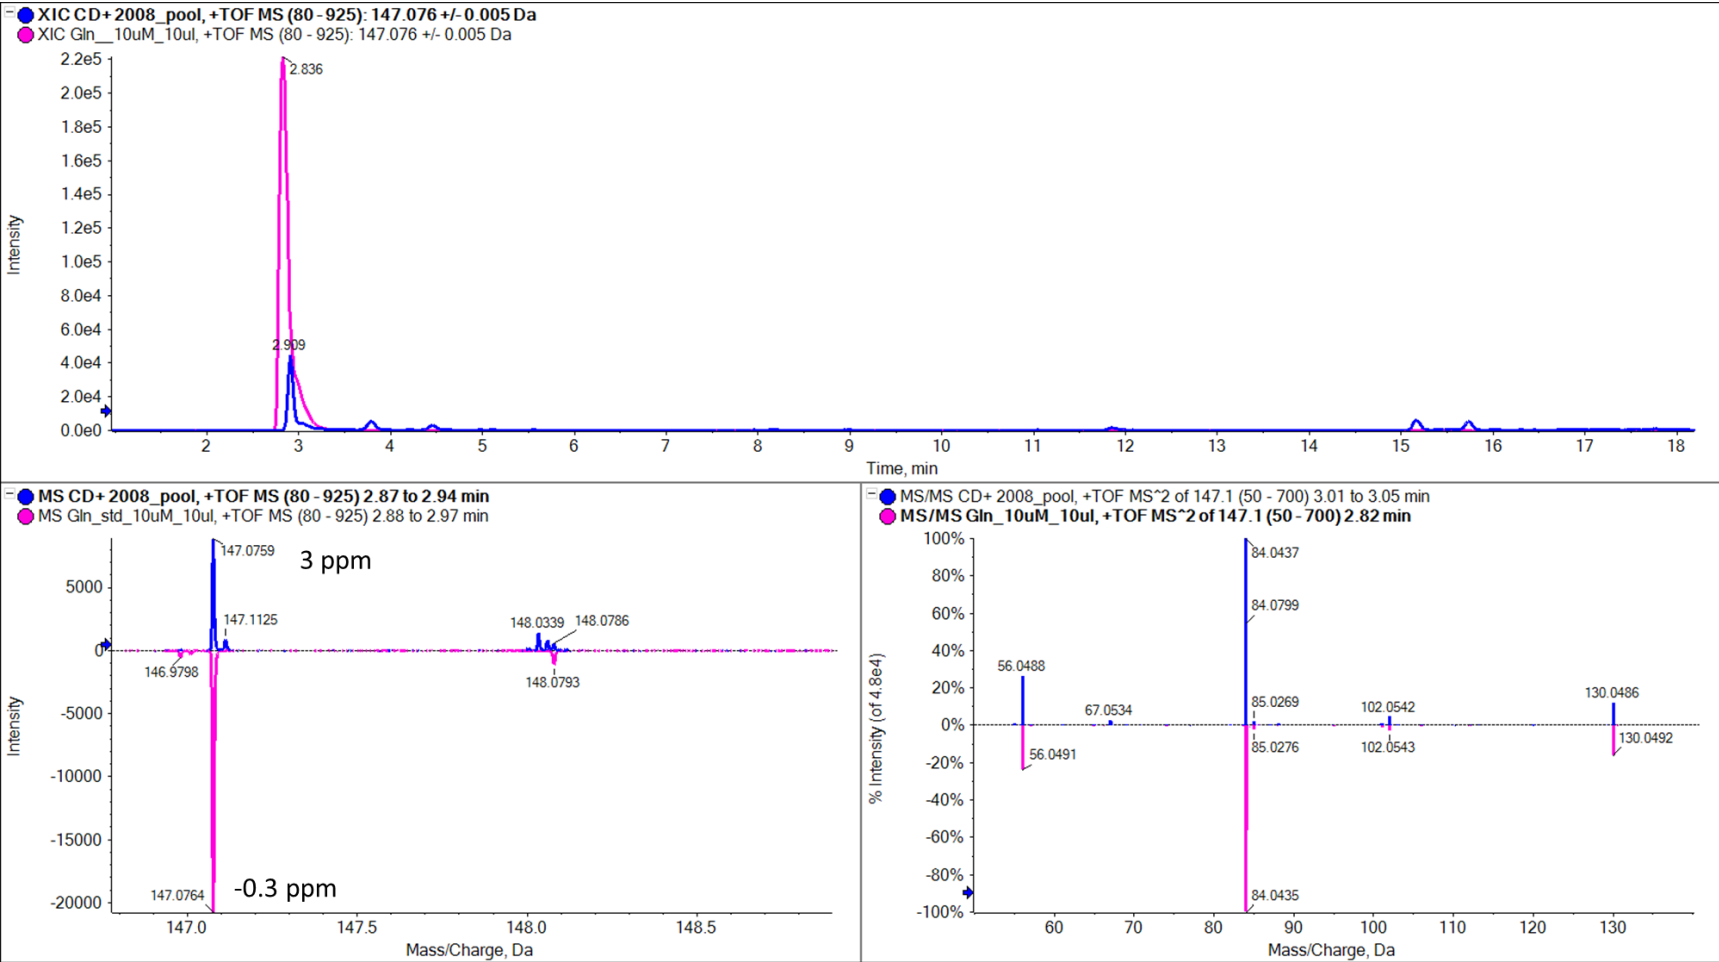

Taurine: 126.0219 m/z, 3.1 min, fold-change = -1.5, p = 3.3e-4

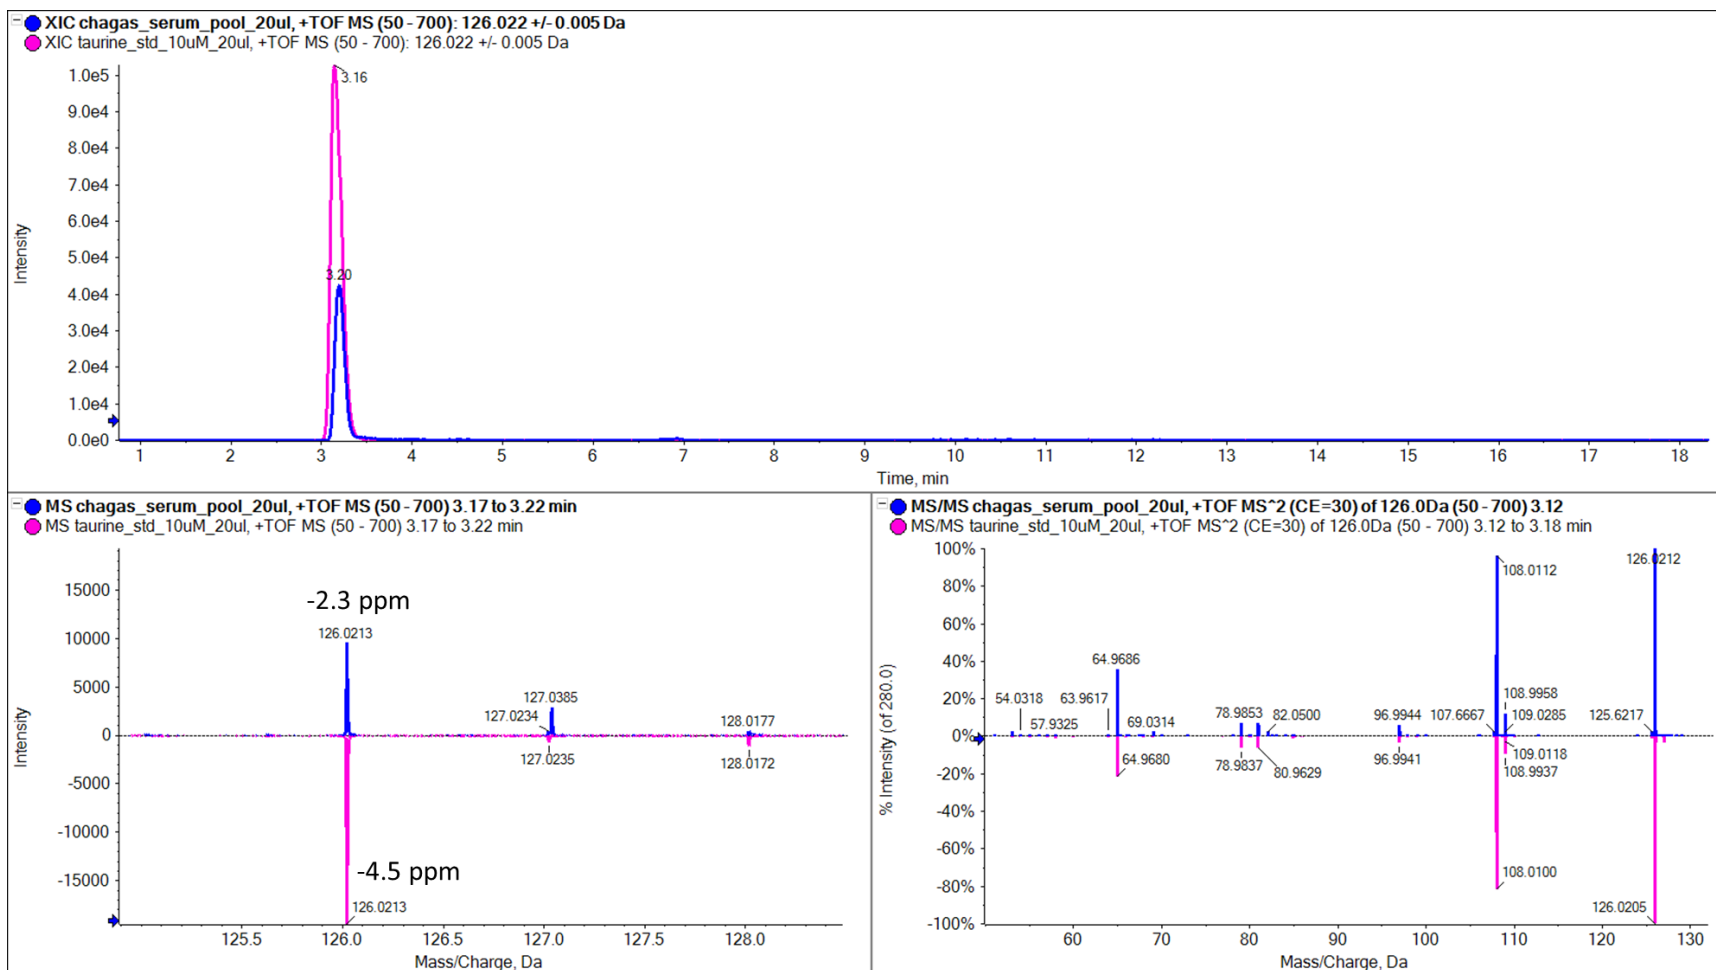

**Figure S3. Relative abundances of selected metabolites in Chagas disease patients, post-treatment follow-up samples and demographically matched negative controls.** Patient and follow-up values were normalised to the controls. Error bars represent mean  $\pm$  standard error of mean.

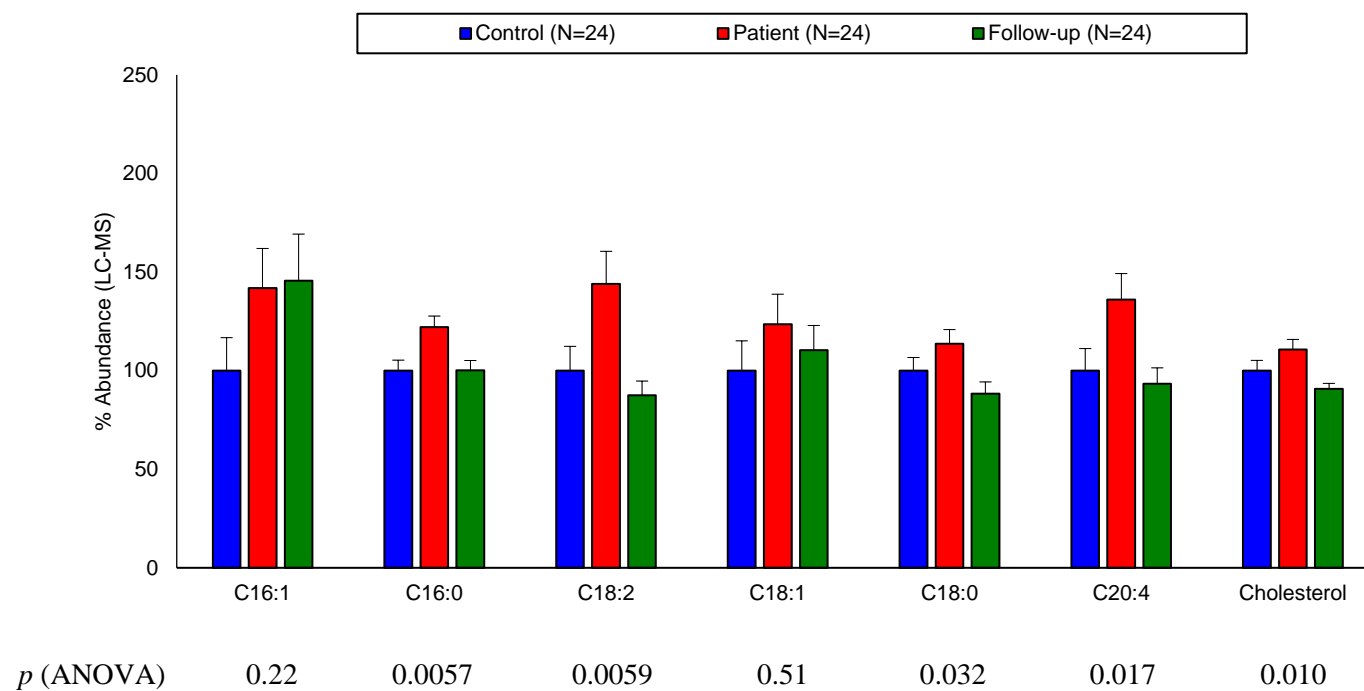

**Figure S4. PCR results from the testes of uninfected (A1-A3), and *T. cruzi* infected mice not subjected to (B1-B4) and subjected to (C1-C4) nifurtimox treatment.** Control negative (-CO) and positive DNA samples (+CO) showing bands at 195 bp, 360 bp, and 550 bp respectively, were included in the analysis to verify that carryover DNA contamination had not occurred.

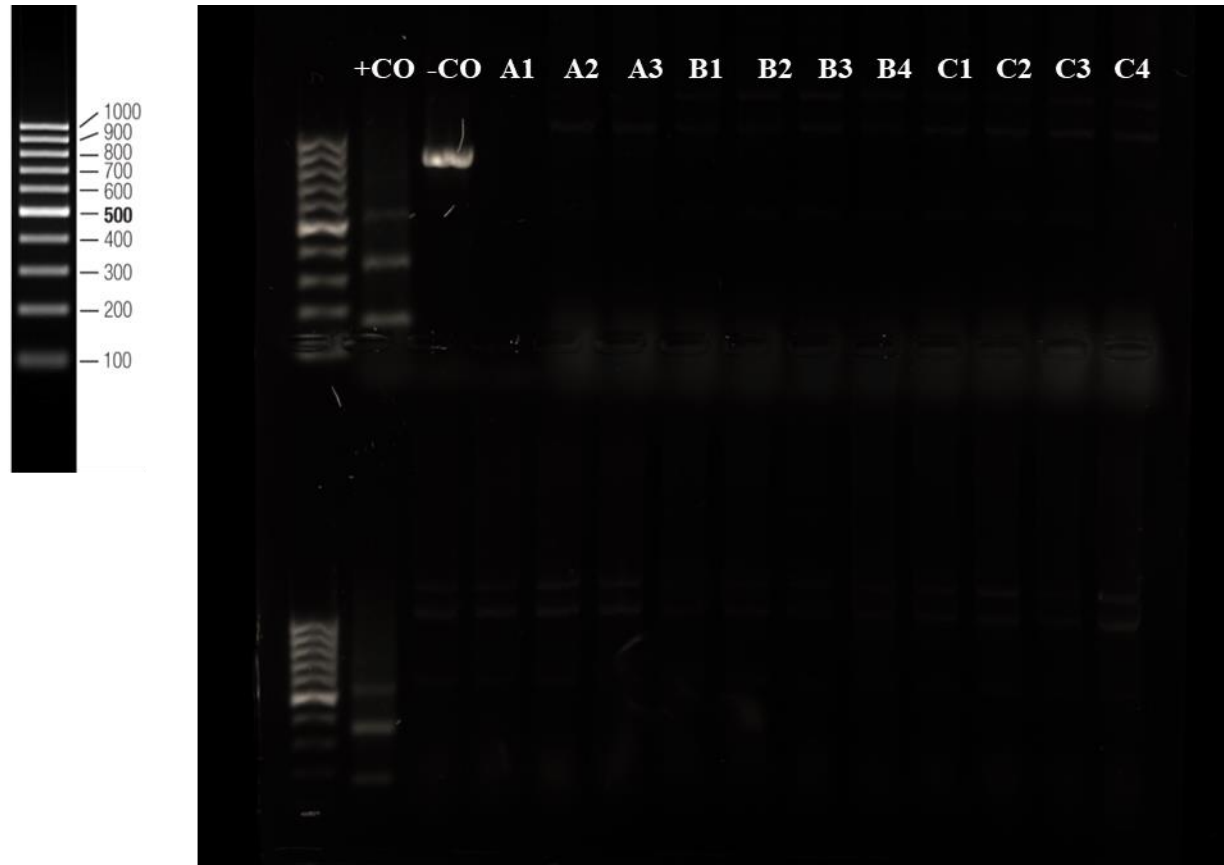

Supplement: mmc1.pdf [file mmc1.pdf]
